# Supplementary material for: Profiling of the Microbiome Associated With Nitrogen Removal During Vermifiltration of Wastewater From a Commercial Dairy
Source: Front Microbiol. 2018 Aug 20;9:1964. doi: 10.3389/fmicb.2018.01964 (PMC6110276; doi:10.3389/fmicb.2018.01964)
Supplement: TABLE S1 — Barcode sequences used in this study. [file Table_1.XLSX]

## Sheet: Table S1
	Supplementary Table S1. Barcode sequences used in this study.
		Barcode sequence
	Sample ID	Forward	Reverse
	LAG A	ATTGCCGC	TGGCATCC
	LAG B	CAACCTTA	TGGCATCC
	LAG C	CCTAATAA	TGGCATCC
	INF A	AATCGATA	TGGCATCC
	INF B	ACCAATTG	TGGCATCC
	INF C	ACTGAAGT	TGGCATCC
	EFF A	TATTAACT	TCGCTGAA
	EFF B	TGACTGCT	TCGCTGAA
	EFF C	TGGCGATT	TCGCTGAA
